# Supplementary material for: Continuous production of 1,4-pentanediol from ethyl levulinate and industrialized furfuryl alcohol over Cu-based catalysts
Source: Royal Society of Chemistry journal article supplement (doi:10.1039/d2se00304j), 2022-01-01
Supplement: d2se00304j1.pdf [file d2se00304j1.pdf]

## Supporting information

### **Continuous production of 1,4-pentanediol from Ethyl levulinate and industrialized Furfuryl Alcohol over Cu-based catalysts**

Hongxing Wang<sup>a,b</sup>, Yueqing Wang<sup>c</sup>, Long Huang<sup>\*d</sup>, Anying Geng<sup>a,b</sup>, Fengjiao Yi<sup>a,b</sup>, Yulei Zhu<sup>\*a</sup>, Yongwang Li<sup>a</sup>

<sup>a</sup> State Key Laboratory of Coal Conversion, Institute of Coal Chemistry, Chinese Academy of Sciences, Taiyuan 030001, PR China. E-mail: [zhuyulei@sxicc.ac.cn](mailto:zhuyulei@sxicc.ac.cn); Fax: +86-351-7560668; Tel: +86-351-7117097

<sup>b</sup> University of Chinese Academy of Sciences, Beijing, 100049, PR China

<sup>c</sup> School of Energy and Power engineering, North University of China, Taiyuan 030051, Shanxi, China

<sup>d</sup> Beijing Key Laboratory of Fuels Cleaning and Advanced Catalytic Emission Reduction Technology, Beijing Institute of Petrochemical Technology, Beijing 102617

## STEM

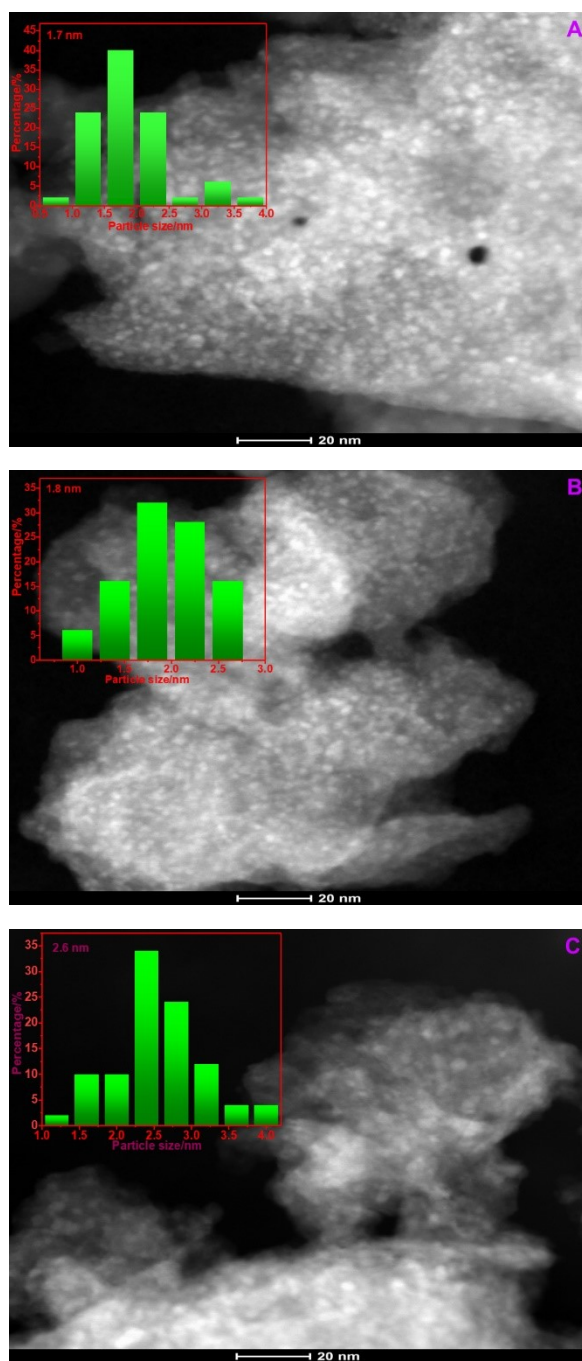

**Figure S1** TEM images and particle size distributions of Cu NPs in different catalysts: (A) CuMgAl-Mix (B) CuMgAl-Na<sub>2</sub>CO<sub>3</sub> (C) CuMgAl-NaOH.

## STEM

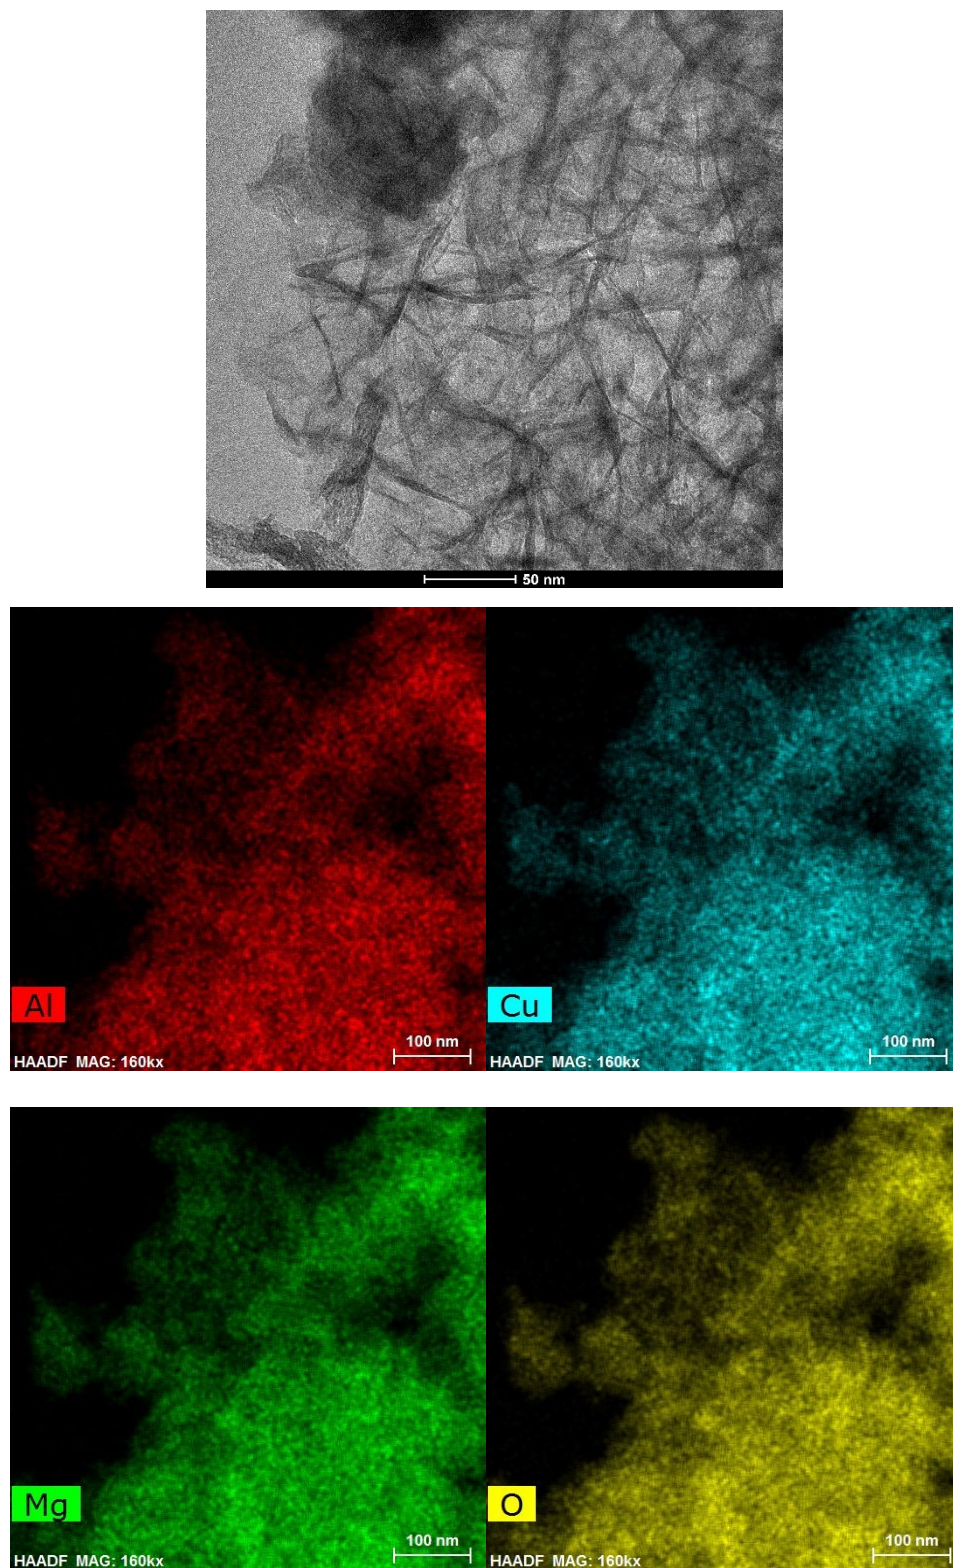

**Figure S2** HAADF-STEM image of CuMgAl-Mix catalysts and the corresponding elemental maps of Cu, Mg, Al and O.

## BET Analysis

**Table S1** Textural properties of the samples obtained from BET analysis.

| Sample | $S_{\text{BET}}$ (m <sup>2</sup> /g) | $S_{\text{mic}}$ (m <sup>2</sup> /g) | $V_{\text{tot}}$ (cm <sup>3</sup> /g) | $V_{\text{mic}}$ (cm <sup>3</sup> /g) |
|--------|--------------------------------------|--------------------------------------|---------------------------------------|---------------------------------------|
| ZSM-5  | 350.9                                | 307.0                                | 0.236                                 | 0.152                                 |

$S_{\text{BET}}$  is the specific surface area;  $S_{\text{mic}}$  and  $V_{\text{mic}}$  were calculated by t-plot method.

## BET Analysis and NH<sub>3</sub>-TPD profiles

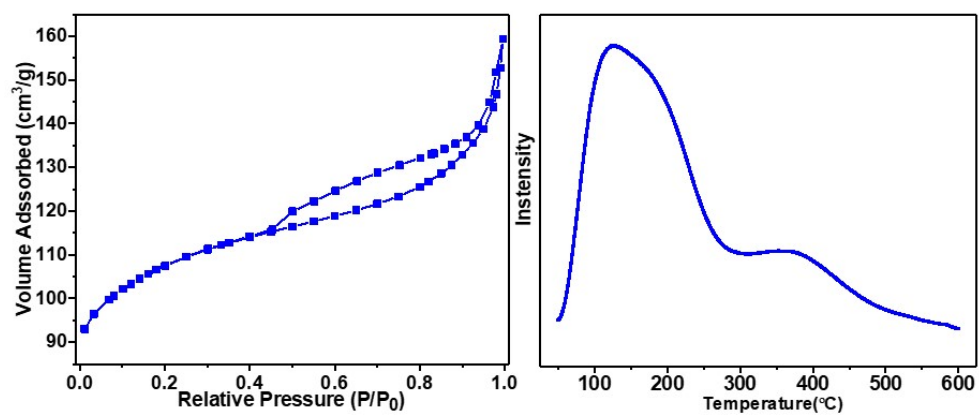

**Figure S3** N<sub>2</sub> adsorption-desorption isotherms and NH<sub>3</sub>-TPD curves of HZSM-5

## Stability of the whole process

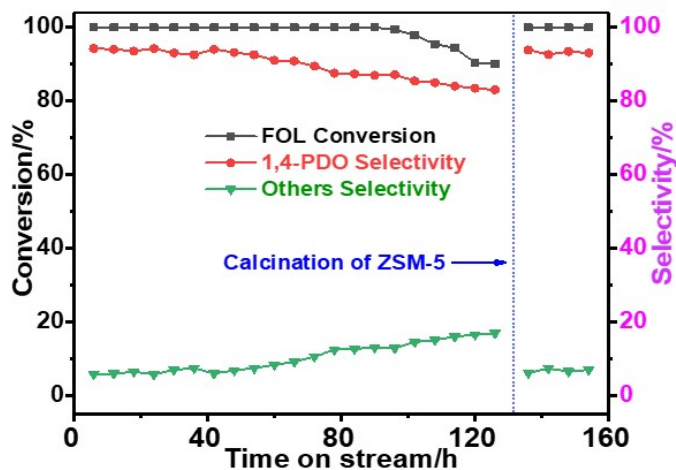

**Figure S4** The stability for one-step conversion of FOL to 1,4-PDO. Reaction conditions: 4.0 g HZSM-5 + 4.0 g CuMgAl-LDH;  $T_1=120$  °C;  $T_2=160$  °C; 5.0 MPa; 5 wt% FOL + 95 wt% EtOH; LHSV=0.36 h<sup>-1</sup> (for FOL solution). The temperature in the upper and lower layers was adjusted by different temperature control devices, and the temperature was labeled as  $T_1$  and  $T_2$  respectively. Others mainly including FOL oligomers.
